# Supplementary material
Source: Elsevier journal article supplement (https://www.sciencedirect.com/science/article/pii/S0021755722000699)
Supplement: mmc1 [file S0021755722000699:mmc1.docx]

JPED-D-21-00472 –Supplementary Material

**Supplementary Figure 1 -** Flowchart of patients included in the study.

**

**
